# Supplementary material
Source: publisher site journal article supplement (https://www.dovepress.com/article/238718)
Supplement: Supplementary file 1 [file get_supplementary_file.php]

**SUPPLEMENTARY FIGURES**

**
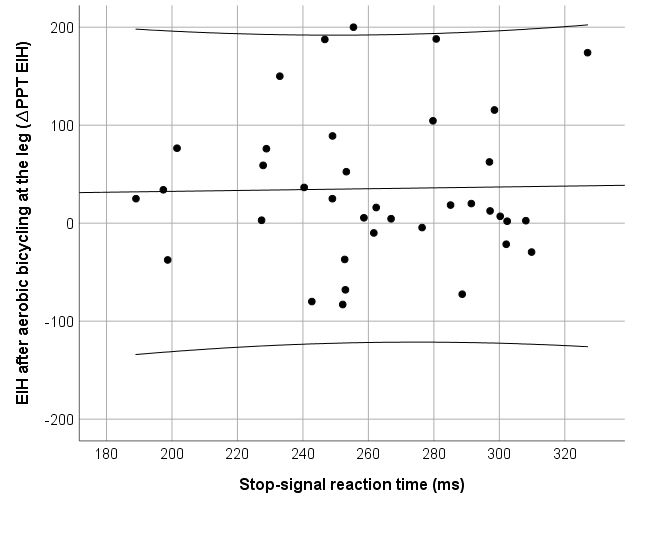
**

**S1:** Scatterplot of **∆**PPTEIH after aerobic bicycling exercise at the leg and stop-signal reaction times(*r =* -.10, 95% CI: -.36; .18, *p =* .553).


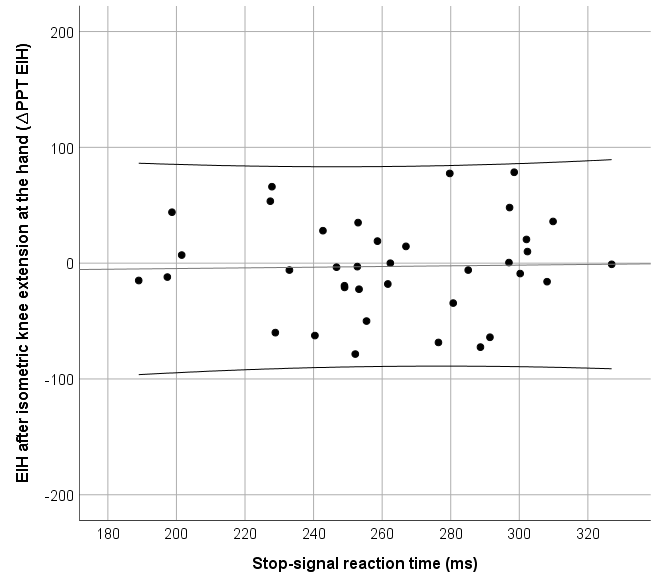


**S2:** Scatterplot of **∆**PPTEIH after isometric knee extension exercise at the hand and stop-signal reaction times(rho *=* -.03, 95% CI: -.30; .25, *p =* .884).

**
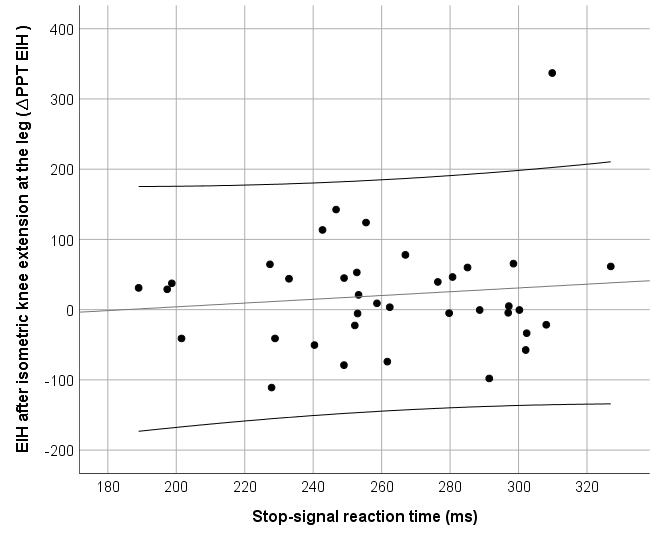
**

**S3:** Scatterplot of **∆**PPTEIH after isometric knee extension exercise at the leg and stop-signal reaction times(rho *=* .03, 95% CI: -.25; .30, *p =* .857).


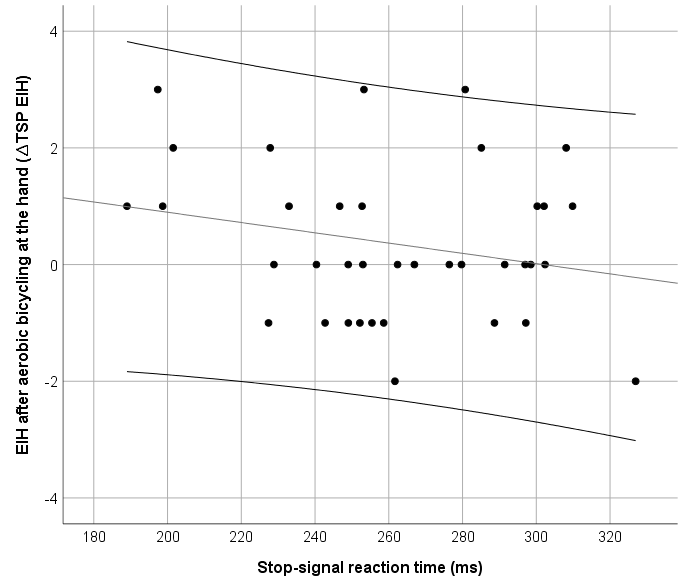


**S4:** Scatterplot of **∆**TSPEIH after aerobic bicycling exercise at the hand and stop-signal reaction times(rho *= -*.14, 95% CI: -.40; .14, *p =* .397).


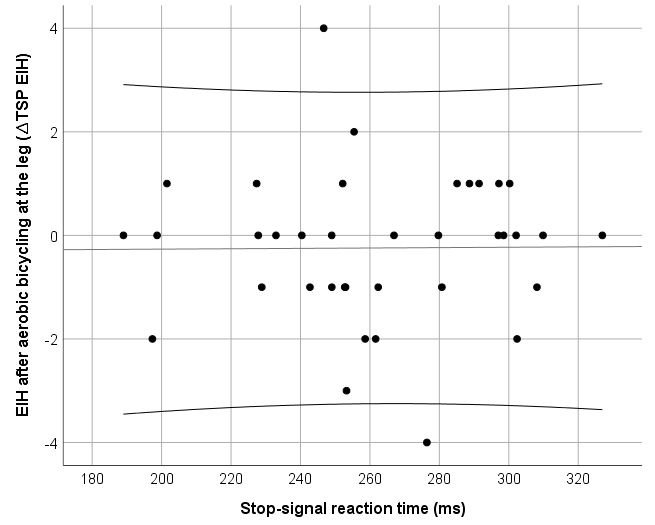


**S5:** Scatterplot of **∆**TSPEIH after aerobic bicycling exercise at the leg and stop-signal reaction times(rho *=* .02, 95% CI: -.26; .29, *p =* .904).


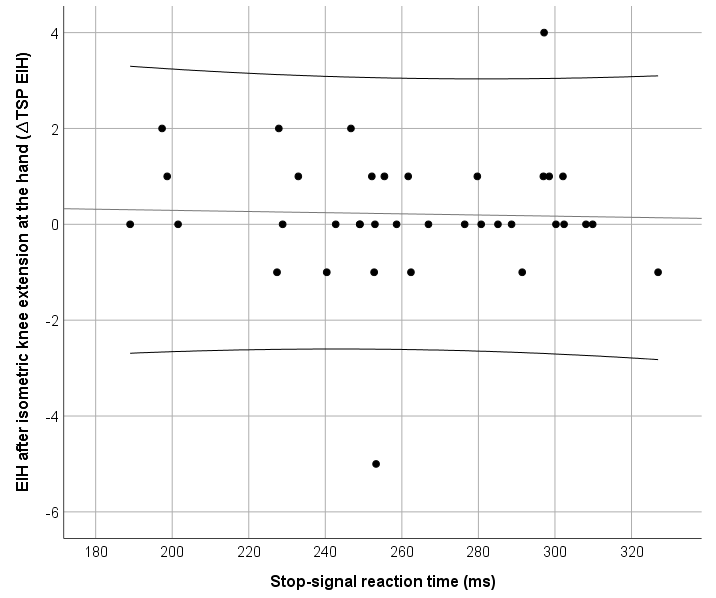


**S6:** Scatterplot of **∆**TSPEIH after isometric knee extension at the hand and stop-signal reaction times(rho *= -*.09, 95% CI: -.36; .20, *p =* .598).


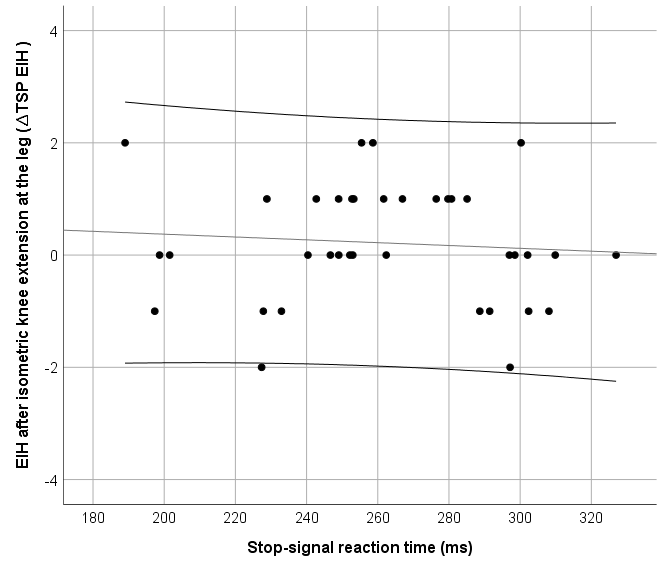


**S7:** Scatterplot of **∆**TSPEIH after isometric knee extension at the leg and stop-signal reaction times(rho *=* .02, 95% CI: -.33; .22, *p =* .728).
